# Supplementary material for: Robert Merle d'Aubigné, 1900–1989
Source: Springer Nature journal article supplement (doi:10.1007/s11999-008-0571-2), 2008-10-21
Supplement: MOESM1 [file 9119592]

Cette opération, dans les arthrites traumatiques et les pseudarthroses, donne des résultats particulièrement remarquables. La majeure partie des résultats médiocres provient des coxarthries ou coxarthroses. Une analyse plus approfondie de ces cas permettra sans doute d'en réduire le nombre. Il faut réserver les indications aux arthrites chroniques qui souffrent beaucoup, ou qui présentent des attitudes vicieuses marquées ou qui ont provoqué l'ankylose des 2 hanches. L'indication est excellente dans les pseudarthroses du col du fémur.

Il faut mettre les chirurgiens en garde contre l'abus que l'on tend à faire des indications de cette intervention qui, bien appliquée, est susceptible de donner de bons résultats dans un grand nombre d'affections de la hanche.

**Evaluation chiffrée de la fonction de la hanche. Application à l'étude des résultats des opérations mobilisatrices de la hanche,**  
par R. MERLE D'AUBIGNÉ, J. CAUCHOIX, J. V. RAMADIER.

J'ai présenté en 1948, au Congrès International d'Amsterdam, un projet de cotation chiffrée de la fonction de la hanche. Nous utilisons cette cotation depuis plus de 3 ans, et nous l'avons appliquée à l'étude comparée des résultats des opérations dirigées sur la coxarthrie et sur les pseudarthroses du col du fémur. Ce sont les résultats de cette étude que je désire vous exposer brièvement.

La transformation des résultats des arthroplasties de la hanche, par l'emploi d'interposition inerte : cupule de vitallium ou tête acrylique soulève un intérêt général.

En ce qui concerne les têtes acryliques, aucune série de résultats importants n'a encore été publiée.

Pour les arthroplasties à cupule, de grandes séries ont été publiées aux U.S.A, mais ces résultats sont tous évalués sans tenir compte de l'état antérieur des malades et classés en : Très bon, Bon, Passable et Médiocre, uniquement d'après l'état du malade au moment où il a été revu après son intervention.

Or, dans les interventions sur la hanche, en général, mais tout particulièrement dans les coxarthries, ce qui compte dans le résultat, c'est la différence entre l'état postopératoire et l'état préopératoire.

Une malade qu'on nous présente, par exemple, marchant avec une canne sans boiter et disant ne plus souffrir qu'après une marche très prolongée, peut être un bon ou un mauvais résultat, suivant le point d'où l'on est parti. Si, auparavant, elle marchait sans canne, même en souffrant légèrement, elle considérera, avec juste raison, le résultat comme mauvais ; si, au contraire, elle ne pouvait faire que quelques pas, avec deux cannes, le résultat sera qualifié de miraculeux.

Ce point rend l'étude des résultats des arthroplasties particulièrement délicate, car la double évaluation fonctionnelle, avant et après l'intervention, est nécessaire. Cette évaluation risque d'entraîner de la part du

chirurgien, quelquefois même du malade, une imprécision, volontaire ou non, qui peut fausser complètement une étude à prétention objective.

En outre, dans un grand service, et encore davantage si l'on compare les travaux des différents services, les examens, étant faits par des observateurs différents, pourront comporter de grandes variations d'interprétation. C'est pourquoi il nous a paru nécessaire de rendre le plus objective possible cette étude fonctionnelle de la hanche en la matérialisant par des chiffres selon le tableau suivant.

TABLEAU I  
Evaluation chiffrée de la fonction de la hanche.

|   | INDOLENCE                                                                      | MARCHE                                                                | MOBILITÉ                                                                       |
|---|--------------------------------------------------------------------------------|-----------------------------------------------------------------------|--------------------------------------------------------------------------------|
| 0 | Douleurs très vives et continues.                                              | Impossible.                                                           | Ankylose en attitude vicieuse.                                                 |
| 1 | Douleurs très vives, empêchant le sommeil.                                     | Seulement avec <i>béquilles</i> .                                     | Ankylose clinique avec attitude vicieuse légère ou nulle.                      |
| 2 | Douleurs vives à la marche empêchant toute activité.                           | Seulement avec deux <i>cannes</i> .                                   | Flexion $< 40^\circ$<br>(abd. = 0)<br>ou attitude vicieuse légère.             |
| 3 | Douleurs vives mais tolérables avec activité limitée.                          | Limitée avec une canne (moins d'une heure) très difficile sans canne. | Flexion $< 40^\circ-60^\circ$ .                                                |
| 4 | Douleurs seulement après la marche, disparaissant rapidement par le repos.     | Avec une canne, même prolongée. Limitée sans canne (claudication).    | Flexion $> 60^\circ-80^\circ$<br>(peut lacer sa chaussure).                    |
| 5 | Douleurs très légères et intermittentes, n'empêchant pas une activité normale. | Sans canne, mais claudication légère.                                 | Flexion $> 80^\circ-90^\circ$ .<br>Limitation de l'abduction ( $> 25^\circ$ ). |
| 6 | Indolence complète.                                                            | Normale.                                                              | Flexion $> 90^\circ$ .<br>Normale.<br>Abd. $> 25^\circ$ .                      |

Dans ce tableau, nous avons cherché à diviser en 6 degrés l'altération possible de la fonction de la hanche sur 3 rubriques essentielles : la douleur ; la mobilité ; la marche.

Nous avons cherché à caractériser chacun de ces degrés par des signes

TABLEAU II  
Résultats éloignés des arthroplasties.

Etat fonctionnel moyen  
de la hanche

Amélioration apportée  
(nombre de cas)



TABLEAU III  
Pseudarthroses du col. Résultats (R. Menle d'Aubigné).

|                                            | Nombre<br>de cas | Résultats : nombre et pourcentage. |        |           |        |       |                                |        | Résult. foncl. moyens<br>normale = 6 |        |  |
|--------------------------------------------|------------------|------------------------------------|--------|-----------|--------|-------|--------------------------------|--------|--------------------------------------|--------|--|
|                                            |                  | Très bons                          | Bons   | Passables | Echecs | Morts | ni revus<br>ou trop<br>récents | Indol. | Mobil.                               | Marche |  |
| Enclouages.....                            | 8                | 5 72 %                             | —      | 2 28 %    | 0      | 0     | 1                              | 4,9    | 5,9                                  | 5,1    |  |
| Ostéotomie { avant 1944.....               | 20               | 2 14 %                             | 6 43 % | 2 14 %    | 4 28 % | 1     | 5                              | 4,1    | 4,6                                  | 3,8    |  |
| 36 obs. { depuis 1944.....                 | 21               | 6 40 %                             | 7 46 % | 2 13 %    | 3      | 0     | 4                              | 4,     | 4,8                                  | 4,2    |  |
| Réséction de la tête.....                  | 11               | —                                  | 5 55 % | 3 33 %    | 1 11 % | 0     | 2                              | 4,2    | 4,5                                  | 3,4    |  |
| Réséction plastique du col<br>(M. A.)..... | 11               | 5 55 %                             | 3 27 % | 1 9 %     | 3 9 %  | 1     | 1                              | 5,1    | 4,5                                  | 4,1    |  |
| Acrylique (1949).....                      | 17               | 5 50 %                             | 4 40 % | 1 10 %    | —      | 1     | 0                              | 5      | 5,9                                  | 5      |  |
| Totaux.....                                | 92               | 23                                 | 52     | 11        | 11     | 3     | 19                             |        |                                      |        |  |

objectifs, fe  
être retrou

La différe  
retiré de P

A l'aide  
parés des  
au Congrès  
interventio  
vous prése

Les nouv  
inertes (cu  
en effet, d  
comparés s  
ravant.

Notons,  
throplastie  
lentement  
taté même  
premières

C'est po  
rieurs à la  
peu de ter

Pour les  
montant :

Pour les  
Les résu

Dans un  
le bénéfice  
moyen, d'  
tiré de l'o  
diocre ou

Dans l  
quables. I  
constaton  
une grand  
il s'agit d  
l'autre col

Si l'on  
tionnel de  
tats très  
que sur  
très pré  
avec les  
marche  
lité étan

Dans l

objectifs, facilement contrôlables, et qui, dans bien des cas, peuvent même être retrouvés sur des renseignements donnés par correspondance.

La différence de ces chiffres donne le bénéfice positif ou négatif qui a été retiré de l'intervention.

A l'aide de cette cotation, j'avais étudié, il y a 2 ans, des résultats comparés des interventions pour pseudarthroses, dans une communication au Congrès Français d'Orthopédie, et en 48, les résultats comparés des interventions pour coxarthrie. C'est la suite de cette enquête que je désire vous présenter :

Les nouvelles méthodes d'arthroplastie par interposition de substances inertes (cupule de vitallium ou tête acrylique de Judet) nous fournissent, en effet, déjà un certain nombre de résultats éloignés qui peuvent être comparés sur ces bases à ceux des méthodes chirurgicales employées auparavant.

Notons, tout de suite, que les résultats publiés aux U.S.A. pour les arthroplasties à cupule ont montré que le résultat fonctionnel s'améliorait lentement au cours des années qui suivent l'opération. Nous avons constaté même, sur le temps relativement restreint qui nous sépare de nos premières interventions, soit 2 ans, la même amélioration progressive.

C'est pourquoi les résultats que nous présentons aujourd'hui sont inférieurs à la réalité, car beaucoup concernent des malades opérés depuis peu de temps.

Pour les arthroplasties à cupule, nous avons conservé tous les cas remontant au moins à 6 mois.

Pour les arthroplasties à tête acrylique, tous les cas datant de 4 mois.

Les résultats de cette enquête peuvent être schématisés en 3 tableaux :

Dans un premier tableau, après avoir calculé, pour chacun de nos cas, le bénéfice apporté par l'intervention, nous avons calculé le bénéfice moyen, d'une part, et, d'autre part, compté le nombre de cas qui ont retiré de l'opération une amélioration très grande, grande, moyenne, médiocre ou nulle.

Dans les pseudarthroses, les résultats sont particulièrement remarquables. En nous limitant aux 10 cas suivis depuis plus de 6 mois, nous constatons que la moitié ont une très grande amélioration, et 40 p. 100 une grande amélioration. Un seul cas a retiré une amélioration médiocre : il s'agit d'un malade âgé, présentant déjà une pseudarthrose du col de l'autre côté, et dont la marche n'a été que légèrement améliorée.

Si l'on fait, d'autre part, la moyenne des chiffres exprimant l'état fonctionnel de la hanche, avant et après l'intervention, on constate des résultats très impressionnants, puisque, aussi bien sur le plan de la douleur que sur celui de la marche, et que sur celui de la mobilité, on approche très près de la normale. Les résultats contrastent d'une façon frappante avec les moyennes indiquées avant l'intervention et caractérisant une marche presque complètement impossible, des douleurs vives ; la mobilité étant seule peu atteinte.

Dans les coxarthries unilatérales, l'amélioration apportée par l'inter-

vention, quoique moins frappante, est cependant très nette : aussi bien avec l'arthroplastie à cupule métallique qu'avec l'acrylique.

Dans l'ensemble, l'évaluation de l'état fonctionnel moyen après l'opération s'approche de la normale, en ce qui concerne l'indolence constamment obtenue, et la mobilité qui atteint régulièrement 90°.

Ce n'est que lorsque l'on étudie la marche que l'on constate une amélioration moins nette, figurée par le chiffre 4, parce qu'un grand nombre de ces malades ont encore besoin d'une canne soit parce qu'ils ont en même temps une lésion de l'autre côté, soit, surtout, parce qu'il s'agit d'une intervention très récente.

Dans les coxarthries bilatérales, même amélioration. Nous constatons seulement que les résultats concernant la mobilité et la marche sont moins remarquables. En effet, la récupération des mouvements dans les arthrites rhumatismales est toujours moins importante, en raison de l'atteinte des tissus péri-articulaires. Or celle-ci est constante, dans les coxarthries bilatérales.

Notre tableau ne fait pas ressortir de supériorité de l'une des techniques cupule vitallium ou acrylique, mais le nombre de cas est encore trop récent pour que l'on puisse tirer des conclusions valables.

Un deuxième point de vue consiste à comparer ces opérations nouvelles avec les opérations autrefois utilisées. Nous avons fait cette comparaison, d'une part, pour les pseudarthroses du col, d'autre part, pour les coxarthries.

Pour les pseudarthroses du col, le tableau est celui que je vous ai montré, il y a 2 ans, à la suite du rapport de Pierre Lance. Il comparait les résultats obtenus par l'enclouage, l'ostéotomie, la résection de la tête et les résections plastiques du col. J'ai ajouté les résultats des 17 cas opérés par arthroplastie avec interposition d'acrylic.

Les résultats apparaissent d'emblée très supérieurs à ceux des méthodes utilisées autrefois. Seules sont comparables les suites des enclouages qui s'adressent à des indications très limitées de pseudarthroses relativement récentes, dans lesquelles une réduction parfaite a pu être obtenue par les moyens orthopédiques.

En outre, nous croyons que la supériorité de l'acrylique est beaucoup plus grande que ne l'exprime ce tableau.

En effet, toutes les interventions dirigées contre la pseudarthrose qui conservent la tête sont exposées à une cause d'aggravation qui joue dans un grand nombre de cas : la nécrose de la tête fémorale.

En fait, aussi bien nos ostéotomies que nos résections plastiques du col ont montré un certain nombre d'échecs tardifs qui ont diminué la qualité des résultats éloignés.

3 de ces malades qui avaient été classés comme bons résultats, au moment où ce tableau avait été établi, ont fait secondairement des accidents d'arthrose qui ont nécessité une intervention par interposition d'acrylic. On peut espérer que cette détérioration tardive des résultats ne se produira pas avec l'acrylic, puisqu'il n'y a aucune cause de déformation de la tête.

Nous n'avons pas eu, sur une série de 50 acryliques, un seul accident de fracture de la prothèse.

Dans un dernier tableau, nous avons comparé les résultats des différentes opérations pour coxarthrie : arthrodèses, arthroplasties classiques, arthroplasties avec interposition inerte. Les résultats sont égale-

TABLEAU IV

| RÉSULTATS<br>au point de<br>vue de... | ARTHROPLASTIES      |                            |                     | ARTHRODÈSES<br>41 cas |     |
|---------------------------------------|---------------------|----------------------------|---------------------|-----------------------|-----|
|                                       | Classique<br>15 cas | Cupule vitallium<br>24 cas | Acrylique<br>10 cas |                       |     |
| La<br>douleur                         | 6                   | 25%                        | 41%                 | 40%                   | 72% |
|                                       | 5                   | 37%                        | 50%                 | 40%                   | 28% |
|                                       | 4                   | 37%                        | 9                   | 20                    |     |
|                                       | 3                   |                            |                     |                       |     |
|                                       | 2                   |                            |                     |                       |     |
|                                       | 1                   |                            |                     |                       |     |
|                                       | 0                   |                            |                     |                       |     |
| La<br>mobilité                        | 6                   |                            | 37,5%               | 10                    |     |
|                                       | 5                   |                            | 21%                 | 70%                   |     |
|                                       | 4                   | 12                         | 29%                 |                       |     |
|                                       | 3                   | 38%                        | 12                  | 20%                   |     |
|                                       | 2                   |                            |                     |                       |     |
|                                       | 1                   | 50%                        |                     |                       | 98% |
|                                       | 0                   |                            |                     |                       |     |
| La<br>marche                          | 6                   |                            | 10                  |                       | 28% |
|                                       | 5                   | 25%                        | 10                  | 50%                   | 45% |
|                                       | 4                   | 13                         | 60%                 | 10                    | 17  |
|                                       | 3                   | 37%                        | 10                  | 10                    |     |
|                                       | 2                   | 25%                        | 10                  | 30%                   |     |
|                                       | 1                   |                            |                     |                       |     |
|                                       | 0                   |                            |                     |                       |     |

ment assez frappants ; on constate que, dans la presque totalité des cas d'arthroplastie avec interposition inerte, la douleur est presque complètement supprimée, alors qu'avec l'arthroplastie classique, 37 p. 100 des cas conservaient des douleurs.

Si l'on étudie la mobilité, les résultats sont encore plus frappants, puisque 80 p. 100 des arthroplasties acryliques et 60 p. 100 des arthroplasties à cupule de vitallium ont une mobilité qui dépasse l'angle droit, alors que par l'arthroplastie avec interposition de fascia lata, cette éventualité n'est jamais rencontrée.

Si l'on étudie, enfin, la marche, nous voyons qu'avec l'arthroplastie acrylique, 50 p. 100 des malades peuvent marcher sans canne. Avec l'arthroplastie à cupule, 60 p. 100 peuvent marcher une longue distance,

mais ont besoin d'une canne, alors qu'avec les arthroplasties classiques, 25 p. 100 seulement des cas pouvaient se passer d'une canne.

De ce tableau, donc, qui, je le répète, n'enregistre que des résultats extrêmement provisoires et encore trop récents, on peut cependant conclure à la supériorité évidente des arthroplasties avec interposition inerte sur les arthroplasties classiques.

Actuellement, les résultats des arthroplasties sont tels qu'elles doivent être proposées aux malades, de préférence à l'arthrodèse, même dans les coxarthroses strictement unilatérales. Nous réservons les indications de l'arthrodèse à des cas spéciaux de malades désirant une récupération très rapide et n'ayant pas un métier nécessitant la flexion de la hanche, et surtout ceux dont le système musculaire est insuffisant.

Peut-on tirer des conclusions de ces résultats sur la valeur relative des arthroplasties à cupule de vitallium ou à prothèse acrylique ? Nous ne le croyons pas, les interventions sont trop récentes et les cas trop peu nombreux. Nous avons commencé par faire uniquement des arthroplasties à cupule, puis, dans un 2<sup>e</sup> temps, nous avons utilisé l'acrylic, chaque fois que la tête nous paraissait en trop mauvais état pour que sa conservation donne des chances suffisantes de succès, réservant cette technique, cependant, aux cas où le cotyle était parfaitement sain.

Enfin, depuis 6 mois, nous avons étendu les indications de l'acrylic, aux dépens de la cupule, à tous les cas dans lesquels la tête nous paraissait de médiocre qualité, que le cotyle soit bon ou mauvais. Nous faisons, dans ces cas, comme dans l'opération de Smith Petersen, une très large excision du cotyle, comportant son creusement jusqu'à la corticale interne du pelvis.

Nous nous proposons, l'année prochaine, de vous apporter des résultats beaucoup plus complets.

Nous avons fait, en effet, plus de 100 arthroplasties pour des indications diverses, dont les résultats pourront être comparés d'une façon valable dans quelques mois.

#### Sur le traitement des luxations traumatiques anciennes de la hanche, par J. CAUCHOIX et J.-O. RAMADIER.

L'étude des observations cliniques de huit blessés que nous avons traités pour luxations traumatiques anciennes de la hanche nous a montré qu'il convient de chercher à obtenir, par le traitement chirurgical, un résultat anatomique aussi proche que possible de la hanche normale. Les acquisitions récentes de la chirurgie de la hanche, la mise au point technique de l'arthroplastie et de la reposition sanglante, permettent de donner à ces blessés une guérison de bonne qualité fonctionnelle ; les résultats ainsi obtenus sont beaucoup plus satisfaisants que ceux des opérations palliatives naguère préconisées, la résection simple et l'ostéotomie.

Quatre méthodes différentes ont été appliquées chez nos malades : réduction orthopédique, réduction sanglante, arthroplastie, résection.

Les luxations. Cela n'a pas été tenté, de trente jours variable des

La traction luxation iliaque suivie

Observation I  
tation des deux  
rotuliennes des  
ment préalable  
tenue par exte  
suppuration ab  
côté droit. La  
ment se reproduit

Résultat de  
Flexion 90°, ab  
fosse iliaque ex  
sont très limités

A propos de  
dire que, au n  
d'hui formelle  
stabiliser la t  
sur le fragmen

Trois de nos

Observation II  
tômes de paralysie  
ture du crâne et  
de réduction ori  
Comme la hanche  
Le malade, six  
sont normaux et

Observation III  
tique et du crâne  
imparfaite en lux  
Un an plus tard  
poplité externe

Observation IV  
loïdien postérieur  
l'accident. Incis  
détachés et d'un  
stable. Marche le  
4 mois plus tard  
fications périartic

Ainsi la rédu
