# Supplementary material for: Robert Merle d'Aubigné, 1900–1989
Source: Springer Nature journal article supplement (doi:10.1007/s11999-008-0571-2), 2008-10-21
Supplement: MOESM2 [file 9119592]

## Cotation chiffrée de la fonction de la hanche\*

R. Merle d'Aubigné

Le besoin d'évaluer la fonction de la hanche par une cotation chiffrée, dans le but de rendre plus objectives les indications opératoires et l'appréciation des résultats, a donné lieu à de nombreux systèmes. La complexité de certains, qu'explique le désir d'exactitude, les rend difficilement utilisables. Tout récemment, W. HARRIS a présenté un système dans lequel la fonction normale est chiffrée par 100, qui aurait l'avantage de permettre un dépouillement électronique, mais qui a le grave défaut de ne donner que 5 points à la mobilité, de sorte qu'une ankylose bilatérale indolore en extension, serait cotée à 50 p. 100 et après arthroplastie, donnant 60° de flexion et permettant la marche avec deux cannes et la position assise au prix d'une légère douleur, à 32 p. 100 seulement !

Nous sommes restés fidèles à la cotation que nous avons publiée en 1946 qui fut la première à notre connaissance. Sa relative simplicité, puisque les trois aspects de la fonction de la hanche sont cotés de 0 à 6, l'a fait adopter par de nombreux auteurs en France et à l'étranger. On pouvait cependant lui reprocher de ne pas exprimer assez nettement deux facteurs essentiels : le rayon d'action et la stabilité de chaque hanche dans les atteintes bilatérales. C'est pourquoi nous avons cru utile de donner ici et d'expliquer les aménagements que nous avons apportés à cette cotation, et qui incorporent ces deux éléments sans la modifier dans son principe : le rayon d'action est précisé avec la douleur, la stabilité avec la marche grâce à une note donnée à chacune des deux hanches (*tableau I*).

On sait en effet que notre cotation comprend trois chiffres de 0 à 6 exprimant la douleur, la mobilité et la stabilité (à l'appui unilatéral, donc à la marche) de chaque hanche.

### I — LA DOULEUR

Le chiffre 6 représentant une hanche normale indolore, l'importance de la douleur sera exprimée par des chiffres décroissants.

Dans un premier stade la douleur est intermittente, laissant au malade de grandes périodes d'indolence, n'apparaissant que quelques secondes, au démarrage

par exemple, c'est-à-dire après une longue station assise nécessitant un dérouillage ou au contraire après une démarche très prolongée, mais reste légère et disparaît immédiatement par le repos, ce qui correspond au degré 5.

A mesure que la douleur s'accroît, elle va apparaître au bout d'un temps plus court de marche ; on peut donc l'exprimer par la durée de marche indolente. Assez arbitrairement nous désignons par le chiffre 4 des douleurs qui apparaissent au bout de 30 minutes à 1 heure de marche, par le chiffre 3 celles qui apparaissent entre 10 minutes et 30 minutes, par le chiffre 2 celles qui apparaissent avant 10 minutes de marche et enfin par le chiffre 1 les douleurs apparaissant immédiatement dès que le malade se met debout.

Il est assez exceptionnel d'observer des douleurs permanentes existant aussi bien en position couchée qu'en position assise ou en position debout ; elles méritent alors la cotation 0.

### 2 — LA MOBILITÉ

Il faut distinguer deux catégories de cas bien tranchés :

a) *Hanches sans attitude vicieuse* : Ce sont celles chez qui la position 0 est conservée, c'est-à-dire dans lesquelles le membre peut se placer en extension complète, en adduction et rotation indifférentes. Dans cette catégorie de cas, c'est essentiellement la limitation de la flexion qui joue un rôle car la limitation de l'adduction et des rotations ne constitue pas une gêne importante. Quant à la limitation de l'abduction, plus gênante, elle est en principe toujours parallèle ou même en avance sur la limitation de la flexion.

C'est ce qui nous permet d'attribuer la cotation 6 aux malades qui, sans avoir d'attitude vicieuse, peuvent fléchir la hanche jusqu'à 90° ou au delà. La note 5 est attribuée à ceux dont la flexion maxima siège entre 70° et 90°. La note 4 à ceux qui atteignent entre 50° et 70°. La note 3 à ceux qui atteignent entre 30° et 50° et la note 2 à ceux qui n'atteignent pas 30° de flexion.

b) *La deuxième catégorie réunit les malades qui présentent une attitude vicieuse, c'est-à-dire dont le membre ne peut*

\* Cet article a fait l'objet d'une première publication dans la *Revue de Chirurgie Orthopédique*, 1970, 56, 481-486.

TABLEAU I. — Évaluation de la fonction de la hanche.

|   | DOULEUR                             |                                                     | MOBILITÉ                    |                              |                               | MARCHÉ STABILITÉ                                                                                          |
|---|-------------------------------------|-----------------------------------------------------|-----------------------------|------------------------------|-------------------------------|-----------------------------------------------------------------------------------------------------------|
|   |                                     |                                                     | Pas d' attitude<br>vicieuse | Attitude vicieuse en         |                               |                                                                                                           |
|   |                                     |                                                     |                             | Amplitude<br>flexion         | flex. rot.<br>ext.            |                                                                                                           |
| 6 | Aucune                              |                                                     | ≥ 90°                       | Aucune                       | Aucune                        | Normale ou illimitée                                                                                      |
| 5 | Rare et légère                      |                                                     | 80° 70°                     | Aucune                       | Aucune                        | Limitée ou légère<br>boiterie si prolongée.<br>Canne pour les<br>longues distances.<br>Pas d'instabilité. |
| 4 | Apparaissant à la marche au bout de | 30 minutes<br>à 1 heure                             | 70° 50°                     | Abaissier la note de 1 point | Abaissier la note de 2 points | Canne toujours pour<br>sortir, ou boiterie<br>nette.<br>Légère instabilité.                               |
| 3 |                                     | 10 minutes<br>à 20 minutes                          | 50° 30°                     |                              |                               | Canne en permanence.<br>Instabilité.                                                                      |
| 2 |                                     | Avant<br>10 minutes                                 | < 30°                       |                              |                               | Deux cannes                                                                                               |
| 1 |                                     | Immédiatement                                       |                             |                              |                               | Béquilles                                                                                                 |
| 0 |                                     | Permanente<br>même en position<br>assise ou couchée |                             |                              |                               |                                                                                                           |

pas se placer dans la position 0. Le retentissement fonctionnel de ces attitudes vicieuses est plus marqué en ce qui concerne l'abduction, l'adduction et la rotation interne que pour la flexion et la rotation externe. Les malades qui combinent une attitude vicieuse en flexion, en rotation externe, ou les deux, associées à une limitation de flexion qui leur vaudrait les notes 4, 3 ou 2, seront donc placés 1 point plus bas.

D'autres malades ont une attitude vicieuse en abduction ou en adduction. Ces attitudes sont très gênantes car elles entraînent un allongement pour l'abduction, un raccourcissement pour l'adduction, qui doit être compensé par une bascule du bassin, ceci n'étant d'ailleurs possible que si le mouvement inverse est autorisé dans la hanche opposée. L'attitude vicieuse en rotation interne est très rare, mais elle est extrêmement gênante, c'est pourquoi les malades qui associent à une limitation de flexion valant 4, 3 ou 2, une attitude vicieuse en abduction ou en adduction, ou en rotation interne, voient leur note abaissée de 2 points.

### III - LA MARCHÉ

L'étude de la marche doit suivre l'étude de la mobilité car les limitations de mouvements, et en particulier les attitudes vicieuses, l'influencent et entraînent une boiterie.

En l'absence de limitation de mobilité ou d'attitude vicieuse on peut cependant voir des boiteries importantes.

L'importance des troubles de l'appui unilatéral dans la démarche rend indispensable l'examen de l'appui unilatéral préalablement à l'examen de la marche, surtout lorsque les deux hanches sont atteintes.

Dans l'appui unilatéral, il est rare de constater le vrai signe de Trendelenburg dans lequel le bassin bascule en adduction jusqu'à la limite du mouvement ; on voit bien plus souvent une bascule du tronc du côté de l'appui, bascule produite d'instinct par le malade qui cherche à placer le centre de gravité du corps à la verticale de l'appui de la tête sur le cotyle et de la

ligne de transmission des forces au pied, pour supprimer ou diminuer la tendance à la bascule du bassin en adduction, et par voie de conséquence la contraction des abducteurs qui, suivant les lois mécaniques, multiplie par trois la force appliquée sur les surfaces articulaires de la hanche par le poids du corps et du membre soulevé.

Lorsqu'il n'y a pas d'instabilité, la marche est normale et la cotation est 6, et la marche, même prolongée, n'entraîne pas de boiterie et ne demande pas l'usage d'une canne.

Nous donnons donc la note 5 aux malades chez lesquels à l'examen en station unilatérale on ne trouve pas d'instabilité, mais chez qui une légère instabilité se manifeste lors de la fatigue parce que, disent-ils, s'ils marchent plus d'une heure ils se mettent à boiter à moins qu'ils ne soient munis d'une canne.

Quand l'instabilité est nette à l'examen en station unilatérale, les malades ont pratiquement toujours une boiterie nette. Ce sont les malades qui prennent une canne lorsqu'ils sortent de chez eux. Certaines femmes cependant ont la coquetterie de ne pas prendre de canne et préfèrent avoir une boiterie tout en s'efforçant de marcher le moins possible. Ces malades méritent la note 4.

A un degré plus marqué d'instabilité, les malades se servent d'une canne en permanence et l'instabilité est nette à l'examen en station debout. On leur attribue la note 3.

Enfin, la note 2 est réservée aux malades qui ont besoin de deux cannes, c'est-à-dire qui ne peuvent pas supporter l'appui unilatéral trop douloureux, et la note 1 à ceux qui utilisent deux béquilles.

Lorsqu'ils sont donnés dans ces conditions d'examens

TABLEAU II. — Évaluation globale de la fonction de la hanche.

| <i>Douleur</i>                                                                  | <i>Mobilité</i> | <i>Marche</i> | <i>Total</i>       | <i>Appréciation</i> |
|---------------------------------------------------------------------------------|-----------------|---------------|--------------------|---------------------|
| 6                                                                               | 6               | 6             | 18                 | Excellent           |
| 6<br>6<br>5                                                                     | 5<br>6<br>6     | 6<br>5<br>6   | 17                 | Très Bon            |
| 6<br>5                                                                          | 5<br>4          | 5<br>6        | 16                 | Bon                 |
| 5<br>6<br>5                                                                     | 5<br>4<br>4     | 5<br>5<br>6   | 15                 |                     |
| 6<br>4                                                                          | 5<br>6          | 4<br>5        | 15                 | Passable            |
| 5                                                                               | 4               | 5             | 14                 |                     |
| 5<br>4                                                                          | 5<br>5          | 4<br>5        |                    |                     |
| 6                                                                               | 2               | 5             | 13<br>(arthrodèse) |                     |
| Ex : 4<br>5                                                                     | 4<br>3          | 4<br>4        | 12<br>11 10<br>9   | Médiocre            |
| Placer ici les résultats post-opératoires si pas d'amélioration ou aggravation. |                 |               | < 9                | Mauvais             |

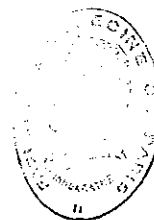

les trois chiffres objectivant la douleur, la mobilité et la stabilité de chaque hanche, caractérisent vraiment l'état fonctionnel d'un malade, ce qui permet en les inscrivant sur une radiographie de face de donner dans une seule image les éléments essentiels de l'état anatomique et fonctionnel des deux hanches.

Il est cependant utile lorsqu'on fait l'inventaire de grandes séries d'opérations sur la hanche de traduire ce code en clair par un mot évaluant de façon globale la fonction de la hanche (*Tableau II*).

C'est ainsi que nous réservons le mot « *excellent* » aux malades qui présentent une cotation 6. 6. 6. = 18, hanche normale, résultat qui est obtenu assez fréquemment dans les prothèses totales.

Nous donnons la mention « *très bon* » à ceux (6. 5. 6.) qui avec une indolence complète et une marche normale ont une légère limitation de la flexion, et aussi à ceux dont le 5 se place dans la colonne douleur puisque celle-ci n'intervient que rarement ou après une marche extrêmement prolongée et de façon très légère, ou dans la colonne marche parce qu'elle n'exprime alors qu'une légère boiterie après une marche prolongée. Tous ces malades ont un total de 17.

La désignation « *bon* » s'applique aux malades dont le total donne 16 ou 15 et dont la cotation d'indolence et de marche est égale ou supérieure à 5, le 4 n'intervenant que sur la mobilité, c'est-à-dire une flexion qui peut atteindre entre 50 et 70°. Ces malades mènent en effet une vie pratiquement normale.

Nous considérons comme « *passable* » la fonction des hanches dont le total donne 15 ou 14 à condition que les colonnes douleur et marche ne soient pas cotées à moins de 4. C'est dans cette catégorie que viendraient se placer les résections tête et col bien réussies, c'est-à-dire avec une bonne mobilité, une bonne indolence, mais une instabilité. On peut aussi y ranger les arthrodèses réussies en admettant que l'indolence et la stabilité compensent la suppression de la mobilité.

Enfin, nous considérons comme « *médiocre* » la fonction de toutes les hanches dont le total est inférieur à 12, et comme « *mauvais* » celles des hanches dont le total est inférieur à 9. C'est dans cette dernière catégorie que nous plaçons également les résultats post-opératoires des malades qui n'ont pas eu d'amélioration du fait de l'opération ou qui ont présenté une aggravation.
